# Supplementary material for: Prevalence of Positive COVID-19 Test Results Collected by Digital Self-report in the US and Germany
Source: PubMed Central journal article supplement (PMC9890282; doi:10.1001/jamanetworkopen.2022.53800), 2023-01-31
Supplement: jamanetwopen-e2253800-s002.pdf [file jamanetwopen-e2253800-s002.pdf]

## Data Sharing Statement

Kolb. Prevalence of Positive COVID-19 Test Results Collected by Digital Self-Report in the US and Germany. *JAMA Netw Open*. Published January 31, 2023.

doi:10.1001/jamanetworkopen.2022.53800

### Data

**Data available:** No

### Additional Information

**Explanation for why data not available:** We will make the original data available eventually, but are currently in the process of defining a GDPR compliant way to do so together with the respective data privacy officers.
